# Supplementary material for: Flow environment and matrix structure interact to determine spatial competition in Pseudomonas aeruginosa biofilms
Source: eLife. 2017 Jan 13;6:e21855. doi: 10.7554/eLife.21855 (PMC5283829; doi:10.7554/eLife.21855)
Supplement: Figure 1—figure supplement 1—source data 1. — DOI: http://dx.doi.org/10.7554/eLife.21855.006 [file elife-21855-fig1-figsupp1-data1.xlsx]

## Sheet: Sheet1
Figure S1	Maximum liquid culture growth rates of study strains
	Occurrence frequency with flow blocked
	Wild Type (GFP)	Wild Type (mCherry)	ΔpelA (mCherry)
	0.008	0.0073	0.0083
	0.0063	0.0063	0.0073
	0.0063	0.0083	0.009
	0.008	0.0073	0.009
mean	0.00716	0.00733	0.00842
st_err	0.000481	0.000408	0.000394
