# Supplementary material for: Flow environment and matrix structure interact to determine spatial competition in Pseudomonas aeruginosa biofilms
Source: eLife. 2017 Jan 13;6:e21855. doi: 10.7554/eLife.21855 (PMC5283829; doi:10.7554/eLife.21855)
Supplement: Figure 1—source data 1. — DOI: http://dx.doi.org/10.7554/eLife.21855.004 [file elife-21855-fig1-data1.xlsx]

## Sheet: Sheet1
Figure 1A	Change of WT frequency as a function of initial frequency in two flow conditions
Straight chamber condition				Column chamber condition
Initial WT freq	Final WT freq	Change		Initial WT freq	Final WT freq	Change
0.1	0.81	0.71		0.1	0.16	0.06
0.1	0.84	0.74		0.1	0.48	0.38
0.1	0.89	0.79		0.1	0.41	0.31
0.2	0.78	0.58		0.1	0.63	0.53
0.2	0.79	0.59		0.2	0.55	0.35
0.2	0.87	0.67		0.2	0.61	0.41
0.3	0.87	0.57		0.2	0.63	0.43
0.3	0.91	0.61		0.3	0.41	0.11
0.3	0.9	0.6		0.3	0.61	0.31
0.4	0.83	0.43		0.3	0.63	0.33
0.4	0.86	0.46		0.3	0.68	0.38
0.4	0.89	0.49		0.4	0.54	0.14
0.5	0.94	0.44		0.4	0.65	0.25
0.5	0.86	0.36		0.5	0.64	0.14
0.5	0.87	0.37		0.5	0.69	0.19
0.6	0.93	0.33		0.5	0.67	0.17
0.6	0.92	0.32		0.5	0.69	0.19
0.6	0.94	0.34		0.6	0.69	0.09
0.7	0.95	0.25		0.6	0.59	-0.01
0.7	0.98	0.28		0.7	0.63	-0.07
0.7	0.98	0.28		0.7	0.69	-0.01
0.8	0.97	0.17		0.7	0.54	-0.16
0.8	0.96	0.16		0.7	0.65	-0.05
0.8	0.98	0.18		0.8	0.72	-0.08
0.9	0.95	0.05		0.9	0.9	0
0.9	0.91	0.01		0.9	0.79	-0.11
0.9	0.96	0.06		0.9	0.89	-0.01
				0.9	0.55	-0.35
