# Supplementary material for: Flow environment and matrix structure interact to determine spatial competition in Pseudomonas aeruginosa biofilms
Source: eLife. 2017 Jan 13;6:e21855. doi: 10.7554/eLife.21855 (PMC5283829; doi:10.7554/eLife.21855)
Supplement: Figure 2—source data 1. — (A) WT and ΔpelA biomass accumulation. (C) WT and ΔpelA cell counts in effluent. DOI: http://dx.doi.org/10.7554/eLife.21855.008 [file elife-21855-fig2-data1.xlsx]

## Sheet: Sheet1
Figure 2A	WT and ΔpelA biomass accumulation
	Mono-culture biofilms		cells / 100 μm^2		1:1 Co-culture biofilms		cells / 100 μm^2
	Wild Type	ΔpelA	n = 6		Wild Type	ΔpelA	n = 3
	133.2	15.92			86.7714	5.21871
	145.2	24.73			99.907	16.1217
	146.5	21.21			70.0008	10.2875
	134.8	16.83
	130.9	12.7
	107.6	14.29
mean	133.033	17.6133		mean	85.5598	10.5427
st_dev	14.0281	4.52215		st_dev	14.9899	5.45598
Figure 2C	WT and ΔpelA cell counts in effluent
Biofilm	WT Frequency		n=3		Effluent	WT Frequency		n=3
	0 h	24 h	48 h			0 h	24 h	48 h
	0.565	0.845	0.827			0.51	0.531	0.559
	0.604	0.88	0.812			0.51	0.615	0.595
	0.541	0.919	0.933			0.514	0.603	0.582
mean	0.57	0.881333	0.857333		mean	0.511333	0.583	0.578667
st_dev	0.0317962	0.037018	0.0659571		st_dev	0.0023094	0.0454313	0.01823
