# Supplementary material for: Flow environment and matrix structure interact to determine spatial competition in Pseudomonas aeruginosa biofilms
Source: eLife. 2017 Jan 13;6:e21855. doi: 10.7554/eLife.21855 (PMC5283829; doi:10.7554/eLife.21855)
Supplement: Figure 3—figure supplement 3—source data 1. — DOI: http://dx.doi.org/10.7554/eLife.21855.014 [file elife-21855-fig3-figsupp3-data1.xlsx]

## Sheet: Sheet1
Figure 3 - figure supplement S2 comparison of competition in simple chambers with or without flow
	Planar Chamber, with flow (from Figure 1)				Planar Chamber, without flow
	Initial WT Freq	Final WT freq	Change		Initial WT Freq	Final WT freq	Change
	0.5	0.94	0.44		0.5	0.127892	-0.372108
	0.5	0.86	0.36		0.5	0.18857	-0.31143
	0.5	0.87	0.37		0.5	0.259162	-0.240838
					0.5	0.172041	-0.327959
	mean	0.89	0.39
	std_dev	0.043589	0.043589		mean	0.186916	-0.313084
					std_dev	0.0545507	0.0545507
