# Supplementary material for: Flow environment and matrix structure interact to determine spatial competition in Pseudomonas aeruginosa biofilms
Source: eLife. 2017 Jan 13;6:e21855. doi: 10.7554/eLife.21855 (PMC5283829; doi:10.7554/eLife.21855)
Supplement: Figure 3—source data 1. — Biomass accumulation of WT and Pel-deficient P. aeruginosa under different degrees of shear stress. (B) WT and ΔpelA biomass accumulation. (C) WT and ΔpelA growth under variable shear DOI: http://dx.doi.org/10.7554/eLife.21855.010 [file elife-21855-fig3-data1.xlsx]

## Sheet: Sheet1
Figure 3B	WT and ΔpelA biomass accumulation
	Occurrence frequency with flow blocked				Occurrence frequency with flow open
	Wild Type	ΔpelA	n = 3		Wild Type	ΔpelA	n = 3
	0.238	0.0844			0.192	0.04
	0.135	0.067			0.105	0.0484
	0.153	0.0714			0.098	0.0164
mean	0.175333	0.0742667		mean	0.131667	0.0349333
st_err	0.0317613	0.00522345		st_err	0.0302343	0.00957868
Figure 3C	WT and ΔpelA growth under variable shear
Shear
(x10^-4 Pa)	0			6.3			63
	Wild Type	ΔpelA		Wild Type	ΔpelA		Wild Type	ΔpelA
	66.6	79.9		55.7	8.23		144	0.702
	45.5	82		41.5	2.43		151	6.32
	54.8	12.7		37.2	5.86		137	0.396
	25.9	12.2		84.6	2.17		126	0.0296
	37.7	19.7		45.9	0.809		108	4.67
	27.6			65.1	2.38		148	2.66
					5.82		166
					12.5		122
							125
							131
mean	43.0167	41.3		55	5.02487		135.8	2.46293
st_dev	15.8752	36.3242		17.6667	3.91212		16.8642	2.5722
